# Supplementary material for: Identification of immune subtypes to guide immunotherapy and targeted therapy in clear cell renal cell carcinoma
Source: publisher site journal article supplement (doi:10.18632/aging.204252), 2022-09-01
Supplement: Supplementary file [file aging-v14i17-204252-supplementary-material-SD1.pdf]

SUPPLEMENTARY FIGURES

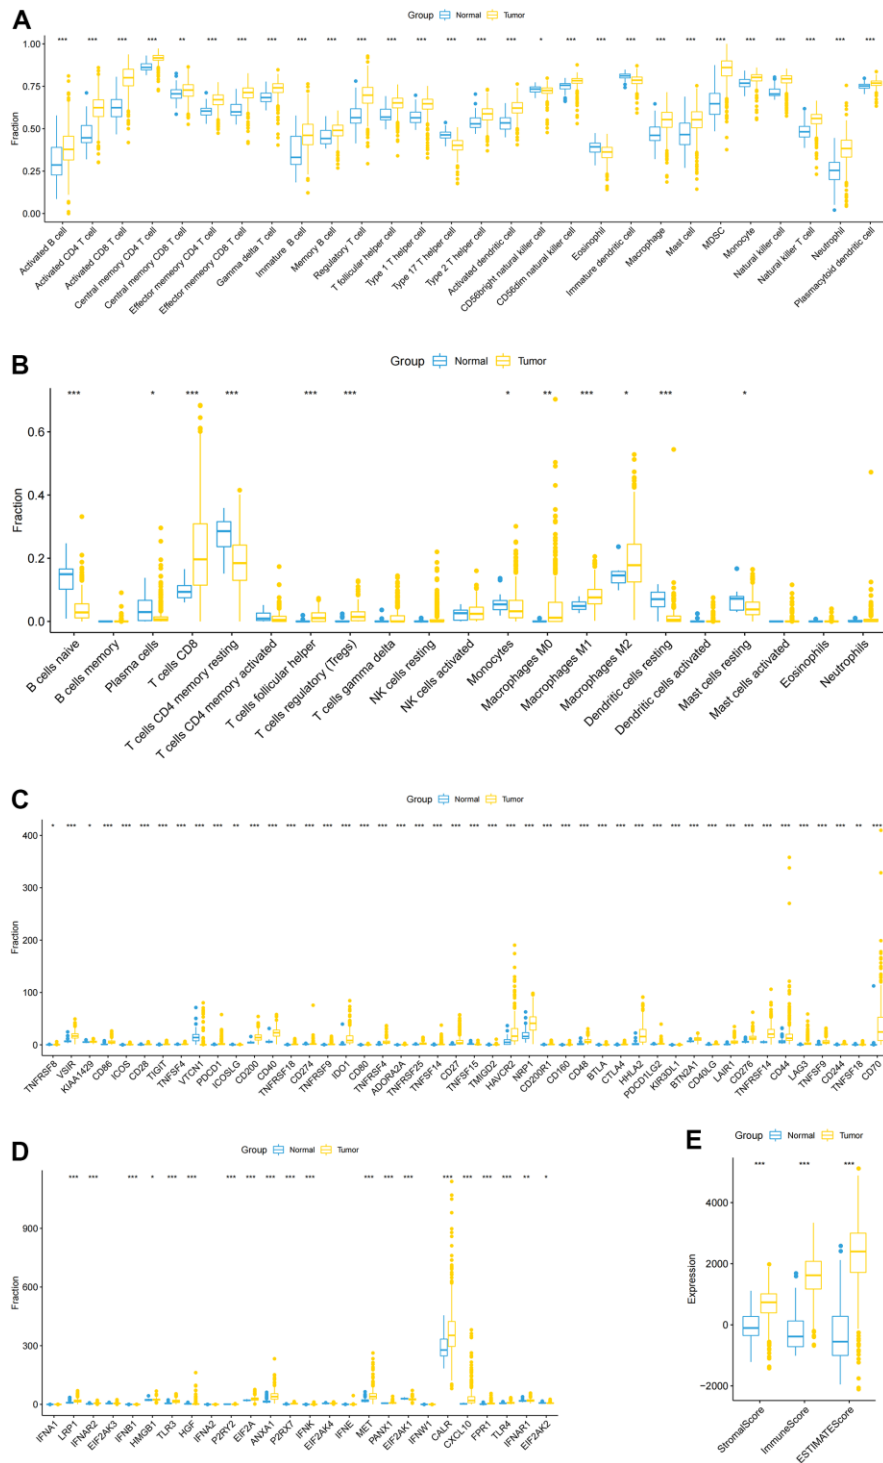

**Supplementary Figure 1. The atlas and landscape of immune infiltration in a ccRCC cohort. (A, B)** Differential expression of immune-infiltrating cells in ccRCC and para-cancerous tissues **(A)** ssGSEA; **(B)** CIBERSORT. **(C)** Differential expression of immune checkpoints in ccRCC and para-cancerous tissues. **(D)** Differential expression of ICD modulators in ccRCC and para-cancerous tissues. **(E)** Characteristics of tumor microenvironment in ccRCC and para-cancerous renal tissue.

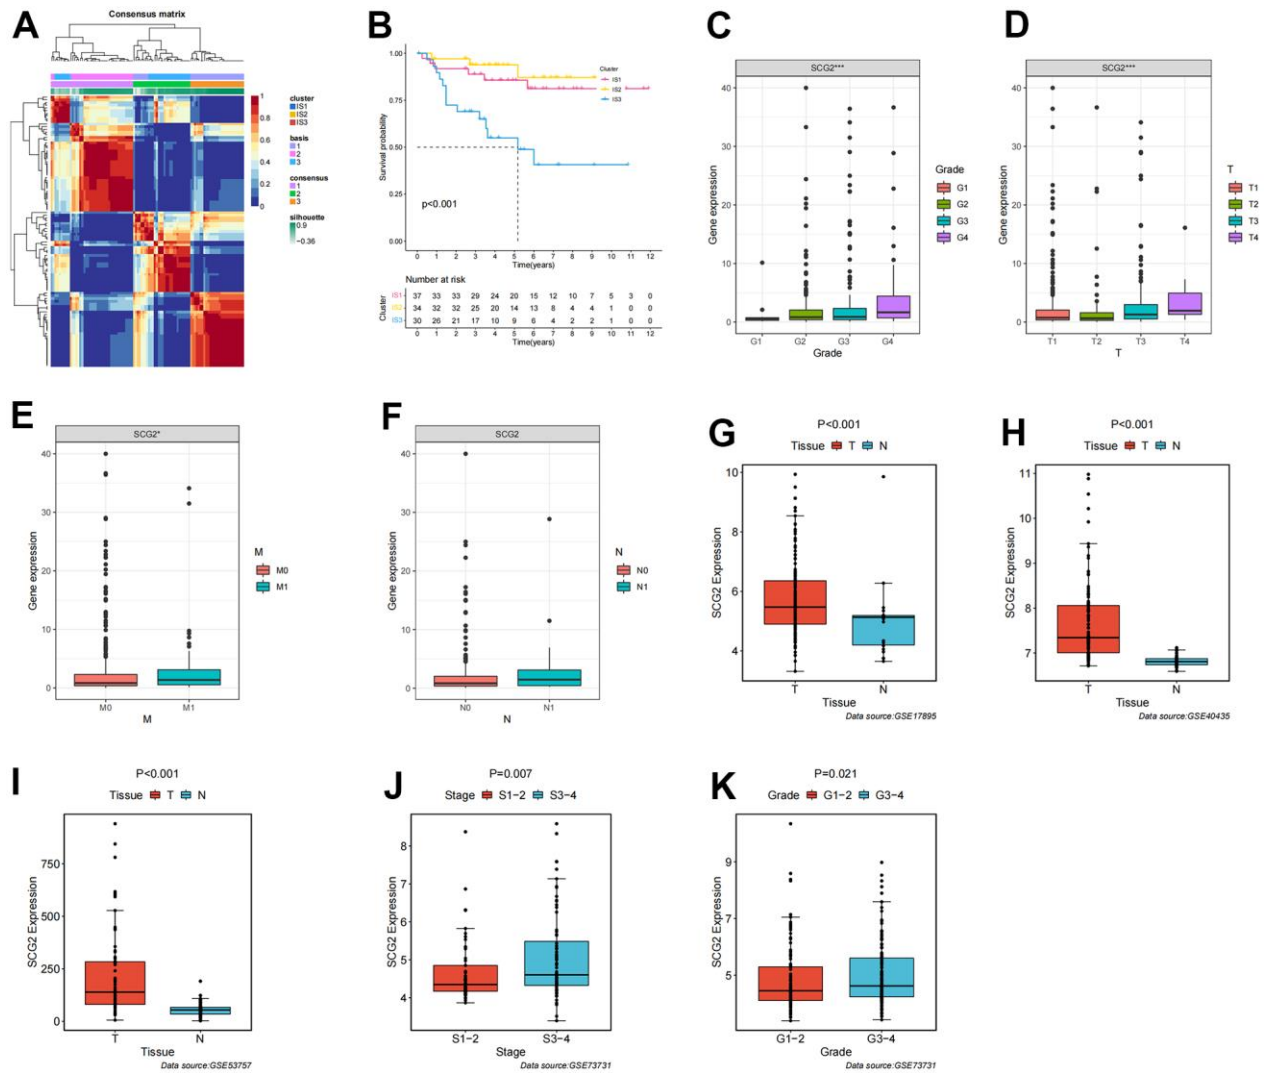

**Supplementary Figure 2. Identification of clinical characteristics of SCG2.** (A) Identification of three distinct ccRCC immune-related molecular subtypes in the E-MTAB-1980 dataset by the NMF algorithm. (B) Kaplan-Meier OS curve for three distinct ccRCC immune-related molecular subtypes. (C–F) Correlation analysis of SCG2 expression levels and different clinical features in the TCGA database. (C) Grade, (D) T stage, (E) M stage, (F) N stage. (G–I) Different expression of SCG2 in ccRCC tissues and normal tissues in the GEO database. (G) GSE17895, (H) GSE40435, (I) GSE53757. (J, K) Correlation analysis of SCG2 expression levels, histological grade, and pathological stage in the GSE73731 database.
